# Supplementary material for: Plants, pollinators and their interactions under global ecological change: The role of pollen DNA metabarcoding
Source: PubMed Central journal article supplement (PMC10947134; doi:10.1111/mec.16689), 2022-09-26
Supplement: MEC-32-6345-s002.pdf [file MEC-32-6345-s002.pdf]

## Supplemental Information for:

# Plants, pollinators, and their interactions under global ecological change: the role of pollen DNA metabarcoding

Karen L. Bell, Katherine J. Turo, Abigail Lowe, Kevin Nota, Alexander Keller, Francisco Encinas-Viso, Laura Parducci, Rodney T. Richardson, Richard M. Leggett, Berry J. Brosi, Kevin S. Burgess, Yoshihisa Suyama, Natasha de Vere

### Supplementary Methods

To assess the current application of pollen DNA metabarcoding to questions of global change, we completed a Web of Science search (accessed 11/30/2021) with the terms: “pollen” and “metabarcoding” or “pollen” and “meta-barcoding”. From a list of 134 results, we excluded irrelevant papers, reviews, and those that focused solely on methods development (Supplementary File S2). We also added several papers (n=28) to this list based on previous knowledge. Following these alterations, we examined a reduced list of 80 papers from 2014-2021 (Table S1). Generally, we found increasing numbers of papers with time, and a shift in 2017, from predominantly proof-of-concept papers to those exclusively focused on answering an ecological question of interest (Figure S1).

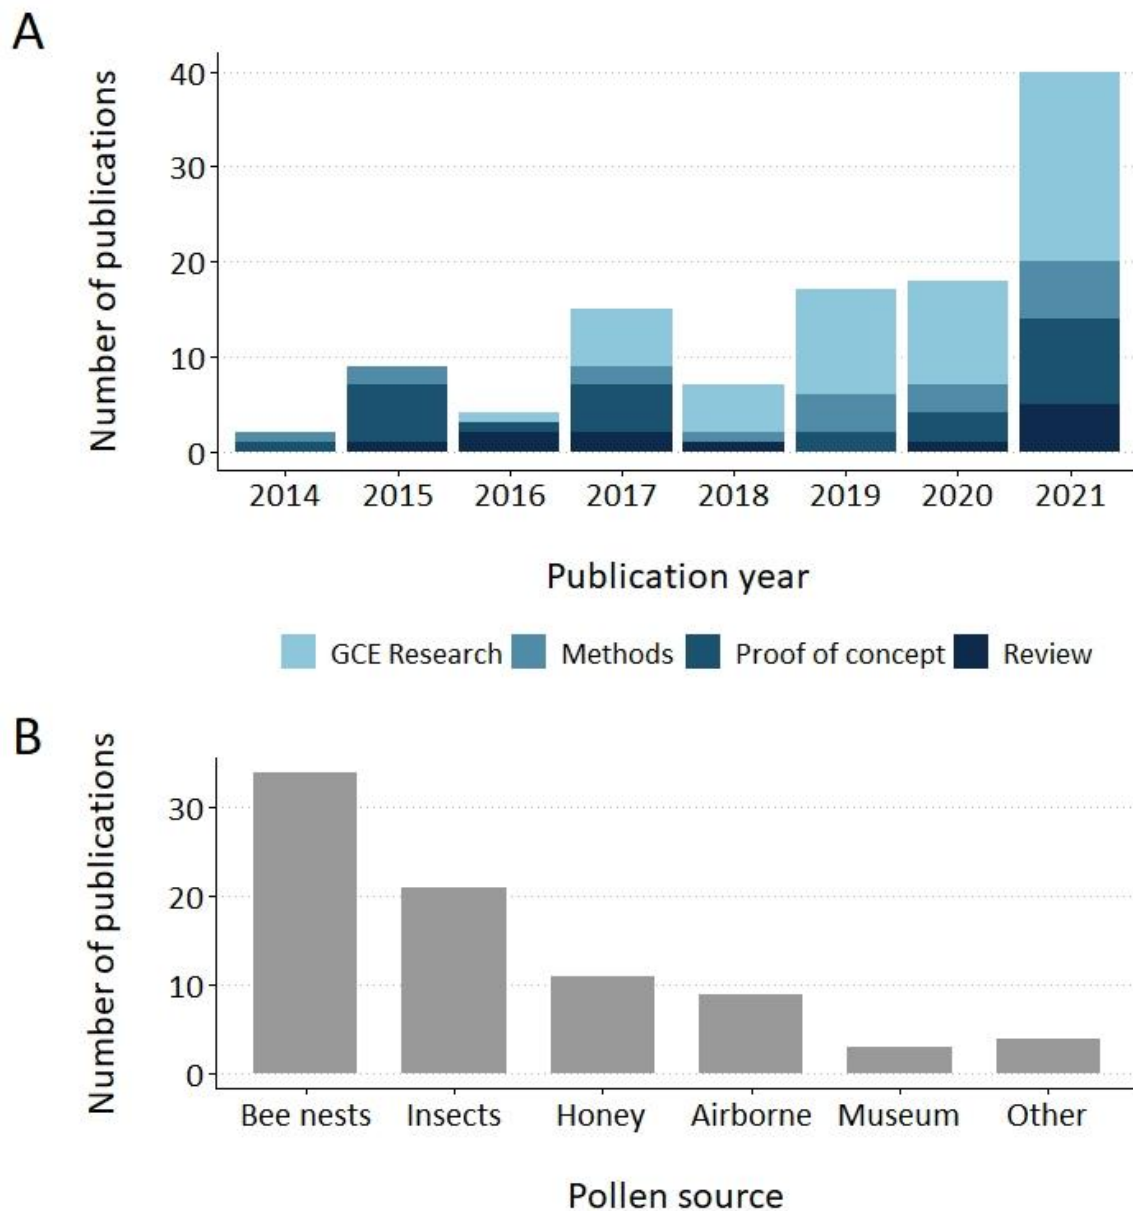

Figure S1. (A) Publications using or reviewing pollen DNA metabarcoding or related methods (n=112). Studies either apply pollen metabarcoding to questions in global change ecology, demonstrate proof-of-concept, develop metabarcoding methods, or review related literature. (B) Publications characterized by pollen source (n=80). Bee nests included pollen collected from honeybee hives with a pollen trap (n=20) and pollen provisions taken from solitary cavity nesting bees (n=15). Insects were predominately net or hand collected foraging bees (n=17) but some flies (Syrphidae) (n=7) and moths (n= 3) were also focal subjects. Pollen sourced from bats (n=1), a glacial core (n=1), and a commercially sourced pollen diet supplement (n=1) were categorized as Other.

# MOLECULAR ECOLOGY

Table S1. Details of all papers from systematic review using pollen DNA metabarcoding to address an ecological hypothesis.

| Study system                    | Location    | Research question                                                                                    | Sampling method                                                           | Gene Region                       | Reference database                                        | Reference                                              |
|---------------------------------|-------------|------------------------------------------------------------------------------------------------------|---------------------------------------------------------------------------|-----------------------------------|-----------------------------------------------------------|--------------------------------------------------------|
| Derived honey bee products      | Italy       | What is the plant composition of a honey bee pollen pellet?                                          | hive pollen trap                                                          | <i>rbcl</i> ,<br><i>trnH-psbA</i> | NCBI GenBank                                              | Galimberti et al. 2014, PLoS ONE                       |
| Derived honey bee products      | Italy       | Can DNA barcoding be used to identify plant species in multi-flower honey?                           | honey samples provided by beekeepers                                      | <i>rbcl</i> ,<br><i>trnH-psbA</i> | curated database from Grigna Settentrionale regional park | Bruni et al. 2015, Food Chemistry                      |
| Honey bee foraging              | USA         | Can pollen metabarcoding characterize honey bee foraging?                                            | hive pollen trap                                                          | ITS1, ITS2                        | NCBI GenBank                                              | Cornman et al. 2015, PLoS ONE                          |
| Honey bee foraging              | UK          | What is the floral composition of honey?                                                             | honey samples provided by beekeepers                                      | <i>rbcl</i>                       | curated database from Barcode Wales, NCBI GenBank         | Hawkins et al. 2015, PLoS ONE                          |
| Honey and solitary bee foraging | Germany     | Can pollen metabarcoding reveal bee foraging from a mixed pollen sample?                             | hive pollen trap, cotton swab of <i>Osmia bicornis</i> nesting cell walls | ITS2                              | ITS2 database curated for Bavarian flora, NCBI GenBank    | Keller et al. 2015, Plant Biology                      |
| Airborne pollen                 | Netherlands | Can metabarcoding quantify pollen from airborne samples at high taxonomic resolution?                | Burkard volumetric air sampler with adhesive tape                         | <i>trnL</i>                       | NCBI GenBank                                              | Kraaijeveld et al. 2015, Molecular Ecology Resources   |
| Honey bee foraging              | USA         | How do metabarcoding and microscopy differently characterize honey bee foraging in an agroecosystem? | hive pollen trap                                                          | ITS2                              | NCBI GenBank, curated with occurrences in USDA PLANTS     | Richardson et al. 2015, Applications in Plant Sciences |
| Pollinator foraging             | USA         | Does floral diversity predict microbiome diversity in a pollen provision?                            | pollen provisions from cavity nest                                        | <i>rbcl</i>                       | NCBI GenBank, curated with occurrences in USDA PLANTS     | McFrederick and Rehan 2016, Molecular Ecology          |

# MOLECULAR ECOLOGY

|                            |           |                                                                                                                        |                                                            |                                  |                                                                   |                                                            |
|----------------------------|-----------|------------------------------------------------------------------------------------------------------------------------|------------------------------------------------------------|----------------------------------|-------------------------------------------------------------------|------------------------------------------------------------|
| Pollinator foraging        | France    | Can metabarcoding reveal and quantify plant pollinator interactions better than observational data?                    | netted insect pollinators (bees, flies, beetles)           | <i>trnL</i> , ITS1               | EMBL database (Ficetola et al. 2010, BMC Genomics)                | Pornon 2016, Scientific Reports                            |
| Pollinator foraging        | USA       | Can pollen metabarcoding reconstruct plant-pollinator networks?                                                        | netted bee individuals                                     | ITS2, <i>rbcl</i>                | NCBI GenBank                                                      | Bell et al. 2017, Applications in Plant Sciences           |
| Honey bee foraging         | Germany   | How does pollen foraging of honey bee colonies change in response to agricultural landscape structure and seasonality? | hive pollen trap                                           | ITS2                             | curated from Bavarian plant list                                  | Danner et al. 2017, PLoS ONE                               |
| Honey bee foraging         | UK        | How can honey reveal honey bees' use of nectar and pollen resources?                                                   | fresh honey collected from comb                            | <i>rbcl</i>                      | curated from Barcode Wales project                                | De Vere et al. 2017, Scientific Reports                    |
| Honey bee foraging         | UK        | Is the pollen diversity of bee bread linked to its nutrient content?                                                   | hive pollen trap                                           | ITS2                             | NCBI GenBank, Viridiplantae ITS2 Database                         | Donkersley et al. 2017, Oecologia                          |
| Pollinator foraging        | France    | What is the complete plant-pollinator foraging network in a semi-natural montane grassland?                            | hand-collected insect pollinators (bees, flies)            | ITS2                             | ITS2 database, ITS plant rDNA cistron sequences from NCBI GenBank | Galliot et al. 2017, Journal of Insect Conservation        |
| Social bee foraging        | Australia | To what extent do bees use diverse forage in species-rich and resource-abundant environments?                          | corbicular loads from netted <i>Tetragonula carbonaria</i> | ITS2                             | NCBI GenBank (Sickel et al. 2015)                                 | Kaluza et al. 2017, Ecosphere                              |
| Airborne pollen            | Finland   | Are there seasonal changes in indoor airborne pollen diversity?                                                        | vacuuming dust from surfaces                               | ITS2                             | NCBI GenBank                                                      | Korpelainen and Pietiläinen 2017, Nordic Journal of Botany |
| Derived honey bee products | India     | Can multi-locus metabarcoding characterize the floral composition of honey?                                            | honey samples provided by beekeepers                       | <i>matK</i> , <i>rbcl</i> , ITS2 | NCBI Viridiplantae database                                       | Laha et al. 2017, AMB Express                              |

# MOLECULAR ECOLOGY

|                        |        |                                                                                                                                  |                                                  |                               |                                                                                  |                                                                |
|------------------------|--------|----------------------------------------------------------------------------------------------------------------------------------|--------------------------------------------------|-------------------------------|----------------------------------------------------------------------------------|----------------------------------------------------------------|
| Honey bee foraging     | USA    | What are the seasonal patterns in colony recruitment dancing for pollen?                                                         | hand-collected honey bees                        | <i>matK</i> ,<br><i>rbcLa</i> | NCBI GenBank curated with San Diego County plant occurrences                     | Park and Nieh 2017, Insectes Sociaux                           |
| Pollinator foraging    | France | How do the properties of pollination networks change with data collected from DNA metabarcoding?                                 | netted insect pollinators (bees, flies, beetles) | <i>trnL</i> , ITS1            | EMBL database (Ficetola et al. 2010, BMC Genomics)                               | Pornon et al. 2017, Scientific Reports                         |
| Honey bee foraging     | USA    | How do metabarcoding and microscopy differently characterize honey bee foraging in high and low intensity agricultural settings? | hive pollen trap                                 | ITS1, ITS2                    | NCBI GenBank                                                                     | Smart et al. 2017, Environmental Entomology                    |
| Lepidopteran migration | China  | What is the spatiotemporal origin of a noctuid moth that migrates long distances?                                                | vertical-pointing searchlight trap               | <i>rbcL</i>                   | NCBI GenBank                                                                     | Chang et al. 2018, International Journal of Molecular Sciences |
| Solitary bee foraging  | UK     | Do cavity nesting bees forage on wildflowers planted in agri-environment schemes?                                                | pollen provisions from cavity nest               | ITS2                          | curated database from Royal Botanic Gardens, Kew and collected reference samples | Gresty et al. 2018, Ecology and Evolution                      |
| Honey bee foraging     | Japan  | What plants do honey bees forage on?                                                                                             | hive pollen trap                                 | <i>trnL</i> , ITS2            | NCBI GenBank                                                                     | Kamo et al. 2018, Applied Entomology and Zoology               |
| Syrphidae foraging     | UK     | What is the structure of hoverfly pollen transport networks?                                                                     | netted hoverfly individuals                      | <i>rbcL</i>                   | curated database                                                                 | Lucas et al. 2018, Journal of Animal Ecology                   |
| Syrphidae foraging     | UK     | Do hoverfly genera exhibit functional complementarity in plant-pollinator networks?                                              | netted hoverfly individuals                      | <i>rbcL</i>                   | curated database                                                                 | Lucas et al. 2018, Scientific Reports                          |

# MOLECULAR ECOLOGY

|                                  |                |                                                                                                                       |                                                    |                         |                                                            |                                                   |
|----------------------------------|----------------|-----------------------------------------------------------------------------------------------------------------------|----------------------------------------------------|-------------------------|------------------------------------------------------------|---------------------------------------------------|
| Pollinator foraging              | Czech Republic | How does bumble bee workforce reduction alter pollen foraging?                                                        | pollen provisions from colony                      | ITS2                    | plant reference specimens, curated NCBI GenBank            | Biella et al. 2019, PLoS ONE                      |
| Airborne pollen                  | UK             | How does the taxonomic composition of grass pollen change throughout the season?                                      | Burkard volumetric air sampler with adhesive tape  | ITS2, <i>rbcL</i>       | curated database, NCBI GenBank                             | Brennan et al. 2019, Nature Ecology and Evolution |
| Historic foraging reconstruction | South Africa   | Can museum specimens reveal plant-pollinator interactions across time?                                                | micropipette tip dipped in glycerol on bee abdomen | ITS1, ITS2, <i>rbcL</i> | NCBI GenBank                                               | Gous et al. 2019, Evolutionary Applications       |
| Honey bee foraging               | Switzerland    | Can pollen metabarcoding of honey be used to assess honey bee foraging across an urbanization gradient?               | honey samples provided by beekeepers               | ITS2                    | NCBI GenBank                                               | Lucek et al. 2019, Apidologie                     |
| Nocturnal moth foraging          | UK             | What different plant-pollinator interactions do microscopy and metabarcoding reveal for nocturnal moths?              | moth proboscis                                     | <i>rbcL</i>             | NCBI GenBank                                               | McGregor 2019, Ecological Entomology              |
| Pollinator foraging              | Australia      | How does pollen usage and nest microbial communities change across landscapes?                                        | pollen provisions from cavity nest                 | <i>rbcL</i>             | NCBI GenBank                                               | McFrederick and Rehan 2019, Microbial Ecology     |
| Pollinator foraging              | Germany        | How do honey bee waggle dances increase the diversity of pollen diets in intensively managed agricultural landscapes? | hive pollen trap                                   | ITS2                    | ITS2 database v. 5, NCBI GenBank curated for German plants | Nürnberg et al. 2019, Molecular Ecology           |
| Pollinator foraging              | France         | How do native mass-flowering plants affect the specialization of insects at individual and species levels?            | netted insect pollinators (bees, flies, beetles)   | <i>trnL</i> , ITS1      | EMBL database (Ficetola et al. 2010, BMC Genomics)         | Pornon et al. 2019, Ecology and Evolution         |
| Urban bee foraging               | UK             | How do urban bees use sown wildflower strips?                                                                         | netted bee individuals                             | <i>rbcL</i>             | curated database from Barcode Wales, NCBI GenBank          | Potter et al. 2019, PeerJ                         |

# MOLECULAR ECOLOGY

|                               |           |                                                                                                |                                                   |                                                  |                                                        |                                                        |
|-------------------------------|-----------|------------------------------------------------------------------------------------------------|---------------------------------------------------|--------------------------------------------------|--------------------------------------------------------|--------------------------------------------------------|
| Honey bee foraging            | USA       | What is the phenological progression of honey bee spring foraging in an agroecosystem?         | hive pollen trap                                  | <i>rbcl</i> , <i>trnL</i> , <i>trnH</i> and ITS2 | NCBI GenBank, Viridiplantae ITS2 Database              | Richardson et al. 2019, Molecular Ecology              |
| Lepidopteran migration        | Spain     | Can pollen metabarcoding track long-distance insect migrations?                                | netted butterfly individuals                      | ITS2                                             | Viridiplantae database, NCBI GenBank                   | Suchan et al. 2019, Molecular Ecology Resources        |
| Biomonitoring                 | Canada    | Can honey bee hives be used to biomonitor plant pests?                                         | hive pollen trap                                  | ITS2                                             | NCBI GenBank                                           | Tremblay et al. 2019, Environmental DNA                |
| Pollinator foraging           | Germany   | How does pollen collection influence bacterial communities in bee nests?                       | pollen provisions from cavity nest                | ITS2                                             | ITS2 database curated for Bavarian flora, NCBI GenBank | Voulgari-Kokota et al. 2019, Ecology and Evolution     |
| Airborne pollen               | Italy     | Can DNA metabarcoding be used to simultaneously analyze airborne fungal and plant particles?   | volumetric air sampler with adhesive tape         | ITS2                                             | PLANITS database curated from NCBI GenBank             | Banchi et al. 2020, Science of the Total Environment   |
| Social and honey bee foraging | Germany   | How do bees' diets shift along a gradient of mass flowering crops?                             | hive pollen trap, netted bumble bees              | ITS2                                             | magicBLAST database                                    | Bänsch et al. 2020, Molecular Ecology                  |
| Airborne pollen               | Australia | What is the utility of pollen metabarcoding for tracking seasonal changes in pollen allergens? | Burkard volumetric air sampler with adhesive tape | <i>rbcl</i>                                      | curated database Rocklea region, NCBI GenBank          | Campbell et al. 2020, Science of the Total Environment |
| Pollinator foraging           | USA       | Do the pollen and microbial components of a bee's diet change across its range?                | pollen provisions from cavity nest                | <i>rbcl</i>                                      | NCBI GenBank, curated with occurrences in USDA PLANTS  | Dew et al. 2020, Insects                               |
| Derived honey bee products    | Iran      | Can pollen metabarcoding be used to determine honey's geographical origin?                     | honey samples provided by beekeepers              | ITS2, <i>rbcl</i>                                | NCBI GenBank                                           | Khansaritoreh et al. 2020, Heliyon                     |

# MOLECULAR ECOLOGY

|                     |           |                                                                                                                                             |                                                            |                         |                                                                       |                                               |
|---------------------|-----------|---------------------------------------------------------------------------------------------------------------------------------------------|------------------------------------------------------------|-------------------------|-----------------------------------------------------------------------|-----------------------------------------------|
| Pollinator foraging | Austria   | How does land use affect <i>Osmia cornuta's</i> pollen foraging?                                                                            | pollen provisions from cavity nest                         | <i>trnL</i>             | NCBI GenBank                                                          | Kratschmer et al. 2020, Ecological Entomology |
| Honey bee foraging  | USA       | Do honey bees use pollen provided by Conservation Reserve Program (CRP) pollinator plantings?                                               | hive pollen trap                                           | <i>rbcl, trnL, ITS2</i> | NCBI GenBank curated with USDA plant occurrences                      | McMinn-Sauder et al. 2020, Insects            |
| Pollinator foraging | USA       | Does landscape structure influence bee diet (pollen diversity) and macronutrient gut content in managed and native bees?                    | pan trapped bees, alimentary canal dissected               | <i>trnL</i>             | NCBI GenBank                                                          | Mogren et al. 2020, Conservation Physiology   |
| Honey bee foraging  | USA       | Can honey bee foraging reveal the overall availability and taxonomic composition of floral resources in an urban environment?               | hive pollen trap                                           | <i>trnL, ITS1, ITS2</i> | NCBI GenBank curated with USDA plant occurrences                      | Sponsler et al. 2020, Ecosphere               |
| Honey bee foraging  | USA       | Which ornamental plants do honey bees forage on?                                                                                            | hive pollen trap                                           | ITS2                    | NCBI GenBank curated with USDA plant occurrences                      | Sponsler et al. 2020, Ecosphere               |
| Honey bee foraging  | Japan     | Which urban plants are pollen and nectar sources for honey bees?                                                                            | hive pollen trap                                           | <i>rbcl</i>             | NCBI GenBank                                                          | Tanaka et al. 2020, BMC Research Notes        |
| Social bee foraging | Australia | Does plant species richness correlate with floral diversity and nutritional quality of larval provisions?                                   | corbicular loads from netted <i>Tetragonula carbonaria</i> | ITS2                    | global ITS2 reference database created with 'bcdatabaser'             | Trinkl et al. 2020, Insects                   |
| Pollinator foraging | USA       | Does plant origin or taxa influence <i>Osmia cornifron's</i> pollen foraging?                                                               | pollen provisions from cavity nest                         | ITS2                    | NCBI GenBank curated with USDA plant occurrences                      | Vaudo et al. 2020, Royal Society Open Science |
| Pollinator foraging | USA       | How does characterization of plant-pollinator foraging networks and bee's diet breadth change when using observational data vs. pollen DNA? | netted bee individuals                                     | ITS2, <i>rbcl</i>       | NCBI GenBank curated with regional plant list and reference specimens | Arstingstall et al. 2021, Molecular Ecology   |



# MOLECULAR ECOLOGY

|                                  |                                               |                                                                                                         |                                                         |                   |                                                                                          |                                                           |
|----------------------------------|-----------------------------------------------|---------------------------------------------------------------------------------------------------------|---------------------------------------------------------|-------------------|------------------------------------------------------------------------------------------|-----------------------------------------------------------|
| Bat foraging                     | Australia                                     | Can bat diets be quantified with pollen DNA metabarcoding methods?                                      | bat fecal samples                                       | ITS2, <i>rbcl</i> | NCBI GenBank                                                                             | Bell et al. 2021, Australian Journal of Zoology           |
| Social bee foraging              | Estonia                                       | What are the foraging preferences of bumblebees in a heterogeneous landscape?                           | trap attached to commercial bumble bee hive             | ITS2              | NCBI GenBank curated for Estonian plants                                                 | Bontsutsnaja et al. 2021, Insects                         |
| Solitary bee foraging            | Belgium, France, Estonia, Poland, Switzerland | Does urbanisation affect larval diet and solitary bee species distribution?                             | pollen provisions from cavity nest                      | ITS2              | ITS2 reference database generated with BCdatabaser (Keller et al., 2020, Bioinformatics) | Casanelles-Abella et al. 2021, Journal of Applied Ecology |
| Derived honey bee products       | Italy                                         | Can pollen DNA metabarcoding identify honey origin?                                                     | honey samples provided by beekeepers                    | <i>trnL</i>       | NCBI GenBank                                                                             | Chiara et al. 2021, Food Control                          |
| Solitary bee foraging            | Belgium                                       | Do mass-flowering crops affect reproduction of wild solitary bees?                                      | pollen provisions from cavity nest                      | ITS2              | NCBI GenBank                                                                             | Eeraerts et al. 2021, Basic and Applied Ecology           |
| Pollinator foraging              | Australia                                     | What is the overlap in resource use between native bee species and managed and feral honeybees?         | netted bee individuals                                  | <i>rbcl</i>       | curated reference database of heathland species                                          | Elliott et al. 2021, Basic and Applied Ecology            |
| Historic foraging reconstruction | South Africa                                  | What are the host plants of leaf-cutter bees, and do they vary among biomes for widespread bee species? | micropipette tip scraping bee abdomen                   | ITS2              | NCBI GenBank, Viridiplantae ITS2 Database                                                | Gous et al. 2021, PLoS ONE                                |
| Derived honey bee products       | Italy                                         | Can metabarcoding determine the floral origin of fungi and pyrrolizidine alkaloids in pollen?           | pollen samples provided by beekeepers, hive pollen trap | ITS2              | ITS2 Viridiplantae sequences from PLANiTS (Banchi et al., 2020)                          | Inacio et al. 2021, Food Research International           |

# MOLECULAR ECOLOGY

|                            |           |                                                                                                                                                                                |                                                      |                                             |                                                                                                                         |                                                    |
|----------------------------|-----------|--------------------------------------------------------------------------------------------------------------------------------------------------------------------------------|------------------------------------------------------|---------------------------------------------|-------------------------------------------------------------------------------------------------------------------------|----------------------------------------------------|
| Pollinator foraging        | USA       | Are observations of plant pollinator-contact effective representation of pollen carriage? How does this as a scientific method compare to two methods of pollen DNA barcoding? | netted bee individuals                               | curated gene region for <i>Clarkia</i> spp. | curated database of 4 <i>Clarkia</i> spp.                                                                               | James et al. 2021, Molecular Ecology Resources     |
| Derived honey bee products | UK        | How have changes in the landscape affected honey bee foraging?                                                                                                                 | honey samples provided by beekeepers                 | ITS2, <i>rbcl</i>                           | curated from Barcode Wales project                                                                                      | Jones et al. 2021, Communications Biology          |
| Airborne pollen            | USA       | Can pollen DNA metabarcoding forensically determine geographic provenance of a settle dust sample?                                                                             | passive particle settling on glass microscope slides | ITS2, <i>rbcl</i>                           | NCBI GenBank                                                                                                            | Lennartz et al. 2021, Scientific Reports           |
| Airborne pollen            | Italy     | What is the usefulness of pollen DNA metabarcoding to assess plant biodiversity from airborne pollen samples?                                                                  | Tauber trap                                          | <i>trnL</i>                                 | NCBI GenBank                                                                                                            | Leontidou et al. 2021, Scientific Reports          |
| Solitary bee foraging      | China     | What are the forage plants of <i>Osmia excavata</i> , and how does this vary with land use and region?                                                                         | pollen provisions from cavity nest                   | ITS2                                        | NCBI GenBank                                                                                                            | Lu et al. 2021, Frontiers in Ecology and Evolution |
| Solitary bee foraging      | Tanzania  | How does an elevational gradient affect cryptic speciation and pollen foraging in <i>Lasioglossum</i> species?                                                                 | bee individuals collected with sterile jars          | ITS2                                        | NCBI GenBank                                                                                                            | Mayr et al. 2021, Ecology and Evolution            |
| Pollinator foraging        | France    | How do plant-pollinator networks vary with climate, altitude, landscape and management?                                                                                        | bee individuals collected with Falcon tubes          | ITS2                                        | NCBI GenBank                                                                                                            | Michelot-Antalik et al. 2021,                      |
| Derived honey bee products | Australia | What plants do honey bees forage on in different regions?                                                                                                                      | honey samples provided by beekeepers                 | ITS2, <i>trnL</i>                           | ITS2DB (Ankenbrand et al., 2015) and PlantAligDB <i>trnL_GH</i> (Santos et al., 2019) databases curated with occurrence | Milla et al. 2021, Ecology and Evolution           |

# MOLECULAR ECOLOGY

|                                  |         |                                                                                                                                |                                                                 |                                    |                                                                                          |                                                            |
|----------------------------------|---------|--------------------------------------------------------------------------------------------------------------------------------|-----------------------------------------------------------------|------------------------------------|------------------------------------------------------------------------------------------|------------------------------------------------------------|
|                                  |         |                                                                                                                                |                                                                 |                                    | records from Atlas of Living Australia                                                   |                                                            |
| Social bee foraging              | Germany | Are flower fields effective for providing foraging habitat for bumblebees?                                                     | bee individuals caught in vial, washed with water, and released | ITS2                               | ITS2 reference database generated with BCdatabaser (Keller et al., 2020, Bioinformatics) | Piko et al. 2021, Basic and Applied Ecology                |
| Solitary bee foraging            | Belgium | Does increased resource availability dilute parasite transmission?                                                             | pollen provisions from cavity nest                              | ITS2                               | NCBI GenBank                                                                             | Piot et al. 2021, International Journal of Parasitology    |
| Honey bee foraging               | USA     | How does land use and season affect pollen foraging and protein content?                                                       | hive pollen trap                                                | ITS1, ITS2                         | NCBI GenBank curated with occurrences in USDA PLANTS                                     | Quinlan et al. 2021, Agriculture, Ecosystems & Environment |
| Honey bee foraging               | USA     | How does land use affect species diversity and temporal turnover of plants foraged by honey bees?                              | hive pollen trap                                                | <i>rbcL</i> , <i>trnL</i> and ITS2 | NCBI GenBank curated with occurrences in USDA PLANTS                                     | Richardson et al. 2021, Molecular Ecology                  |
| Airborne pollen                  | UK      | How does airborne pollen of different grass species vary with space and time, and which species are responsible for allergies? | Burkard volumetric air sampler with 1.5 ml microcentrifuge tube | ITS2                               | curated database, NCBI GenBank                                                           | Rowney et al. 2021, Current Biology                        |
| Historic foraging reconstruction | USA     | What are the host plants of endangered <i>Bombus affinus</i> , and have they changed over time?                                | Corbicular loads from museum specimens                          | ITS2                               | NCBI GenBank curated with occurrences in USDA PLANTS                                     | Simanonok et al. 2021, Biodiversity and Conservation       |

# MOLECULAR ECOLOGY

|                            |                          |                                                                                                                                            |                                      |                                    |                                                        |                                                             |
|----------------------------|--------------------------|--------------------------------------------------------------------------------------------------------------------------------------------|--------------------------------------|------------------------------------|--------------------------------------------------------|-------------------------------------------------------------|
| Pollinator foraging        | Tanzania                 | How are plant and pollinator insect assemblages and interactions in Sub-Saharan farming conditions are shaped by land use intensification? | netted bee individuals               | ITS2                               | plant reference specimens, curated NCBI GenBank        | Tommasi et al. 2021, Agriculture, Ecosystems & Environment  |
| Airborne pollen            | Japan                    | What species are in the airborne pollen and how does this vary seasonally?                                                                 | sequential aerosol sampler           | <i>rbcL</i>                        | <i>rbcL</i> database (Bell et al., 2017)               | Uetake et al. 2021, Science of the Total Environment        |
| Glacial core               | Italy                    | Can pollen metabarcoding estimate historical plant biodiversity archived in glacier cores?                                                 | glacial core                         | <i>trnL</i>                        | NCBI GenBank                                           | Varotto et al. 2021, Scientific Reports                     |
| Social bee foraging        | Australia                | What pollen resources are used by a native social bee?                                                                                     | pollen provisions from colony        | ITS2, <i>rbcL</i>                  | NCBI GenBank curated by plant occurrence at study site | Wilson et al. 2021, Agriculture, Ecosystems & Environment   |
| Derived honey bee products | Sweden, Finland, Estonia | Can pollen, bacterial or fungal DNA isolate the geographic region of honey? Which data performs best?                                      | honey samples provided by beekeepers | ITS2, <i>rbcLa</i> and <i>trnL</i> | NCBI GenBank curated for occurrence in Scandinavia     | Wirta et al. 2021, Scientific Reports                       |
| Derived honey bee products | UK                       | Are accumulated neonicotinoids present in honey, and does this vary with foraged plant species?                                            | honey samples provided by beekeepers | ITS2                               | NCBI GenBank                                           | Woodcock et al. 2021, Agriculture, Ecosystems & Environment |
